# Supplementary material for: Patterns of conventional and complementary non-pharmacological health practice use by US military veterans: a cross-sectional latent class analysis
Source: Springer Nature journal article supplement (doi:10.1186/s12906-018-2313-7), 2018-09-05
Supplement: MOESM2 [file 16099992]

| <b>Characteristic</b>                                        | <b>Responders</b> | <b>Non-responders</b> |
|--------------------------------------------------------------|-------------------|-----------------------|
| Male, % (N)                                                  | 90.5 (1638)       | 92.1 (1744)           |
| Age, Mean (SE)                                               | 38.7 (9.2)        | 33.5 (7.9)            |
| White, % (N)                                                 | 93.8 (1592)       | 92.9 (1658)           |
| Lives in urban area, % (N)                                   | 51.6 (933)        | 52.0 (985)            |
| Eligible for VA healthcare, % (N)                            | 59.2 (1071)       | 51.9 (982)            |
| Anxiety-related diagnosis from VA within past year, % (N)    | 9.4 (174)         | 11.4 (225)            |
| Depression-related diagnosis from VA within past year, % (N) | 11.2 (208)        | 11.9 (235)            |
| PTSD diagnosis from VA within past year, % (N)               | 13.0 (242)        | 11.7 (231)            |
