# Supplementary material for: Patterns of conventional and complementary non-pharmacological health practice use by US military veterans: a cross-sectional latent class analysis
Source: Springer Nature journal article supplement (doi:10.1186/s12906-018-2313-7), 2018-09-05
Supplement: MOESM3 [file 16099992]

| No. classes | LL     | AIC   | aBIC  | BIC   | CAIC  | S     | % success |
|-------------|--------|-------|-------|-------|-------|-------|-----------|
| 1           | -10165 | 20357 | 20390 | 20435 | 20449 | 1.000 | 100%      |
| 2           | -9416  | 18890 | 18957 | 19049 | 19078 | 0.707 | 100%      |
| 3           | -9206  | 18498 | 18598 | 18735 | 18778 | 0.597 | 98%       |
| 4           | -9111  | 18337 | 18472 | 18657 | 18715 | 0.517 | 39%       |
| 5           | -9020  | 18186 | 18356 | 18588 | 18661 | 0.429 | 91%       |
| 6           | -8971  | 18110 | 18306 | 18573 | 18657 | 0.455 | 42%       |
| 7           | -8943  | 18071 | 18288 | 18583 | 18676 | 0.387 | 31%       |
| 8           | -8918  | 18039 | 18277 | 18601 | 18703 | 0.372 | 1%        |
| 9           | -8893  | 18020 | 18293 | 18665 | 18782 | 0.313 | 1%        |
| 10          | -8873  | 18002 | 18300 | 18707 | 18835 | 0.222 | 2%        |
| 11          | -8851  | 17971 | 18283 | 18709 | 18843 | 0.164 | 1%        |

*Abbreviations:* LL: Log-likelihood; AIC: Akaike's Information Criterion; aBIC: Adjusted Bayesian Information Criterion; BIC: Bayesian Information Criterion; CAIC: Bozdogan's consistent AIC; S: Entropy; % success: proportion of random seed values that converged to the global minimum log-likelihood for that number of classes.
