# Supplementary material for: Patterns of conventional and complementary non-pharmacological health practice use by US military veterans: a cross-sectional latent class analysis
Source: Springer Nature journal article supplement (doi:10.1186/s12906-018-2313-7), 2018-09-05
Supplement: MOESM4 [file 16099992]

| <b>Latent class, (% sample in class by maximum probability classification)</b>                             |                         |                          |                              |                                     |                            |                          |
|------------------------------------------------------------------------------------------------------------|-------------------------|--------------------------|------------------------------|-------------------------------------|----------------------------|--------------------------|
|                                                                                                            | Low use<br>(50%, n=923) | Exercise<br>(23%, n=426) | Psychotherapy<br>(6%, n=112) | Manual<br>therapies<br>(12%, n=213) | Mindfulness<br>(5%, n=101) | Multimodal<br>(4%, n=75) |
| <b>Health practice, Probability of class member endorsing use of particular health practice, % or Mean</b> |                         |                          |                              |                                     |                            |                          |
| Overall health fair/poor                                                                                   | 13.8%                   | 11.0%                    | 21.0%                        | 12.4%                               | 12.9%                      | 10.5%                    |
| Physical health worse                                                                                      | 28.1%                   | 27.6%                    | 34.5%                        | 25.2%                               | 23.5%                      | 33.8%                    |
| Emotional problems worse                                                                                   | 24.7%                   | 21.4%                    | 49.2%                        | 23.1%                               | 29.9%                      | 30.4%                    |
| PROMIS-Anxiety                                                                                             | 14.8                    | 15.2                     | 21.5                         | 14.8                                | 17.4                       | 16.9                     |
| PHQ-8                                                                                                      | 5.4                     | 5.3                      | 9.0                          | 5.9                                 | 6.1                        | 5.8                      |
| PCL-5                                                                                                      | 15.8                    | 15.8                     | 30.7                         | 16.4                                | 18.8                       | 18.6                     |
| DAST > 0                                                                                                   | 8.6%                    | 9.4%                     | 12.6%                        | 14.6%                               | 18.6%                      | 6.7%                     |
| AUDIT                                                                                                      | 5.1                     | 5.5                      | 6.7                          | 4.6                                 | 5.1                        | 6.1                      |
| PAM                                                                                                        | 38.9                    | 40.2                     | 38.8                         | 40.4                                | 40.0                       | 42.4                     |
| MMPI - Absorption                                                                                          | 4.4                     | 5.1                      | 5.3                          | 4.9                                 | 6.6                        | 6.7                      |
