# Supplementary material for: Patterns of conventional and complementary non-pharmacological health practice use by US military veterans: a cross-sectional latent class analysis
Source: Springer Nature journal article supplement (doi:10.1186/s12906-018-2313-7), 2018-09-05
Supplement: MOESM5 [file 16099992]

| <b>Exercise vs. Low use</b>                               | <b>Psychotherapy vs. Low use</b> | <b>Manual therapies vs. Low use</b> | <b>Mindfulness vs. Low use</b> | <b>Multimodal vs. Low use</b> |
|-----------------------------------------------------------|----------------------------------|-------------------------------------|--------------------------------|-------------------------------|
| <b>Female, RD (95% CI)*</b>                               |                                  |                                     |                                |                               |
| 0.08 (-0.03 to 0.18)                                      | 0.04 (-0.04 to 0.13)             | 0.16 (0.05 to 0.26)                 | 0.03 (-0.05 to 0.11)           | 0.25 (0.16 to 0.35)           |
| <b>4-year degree, RD (95% CI)</b>                         |                                  |                                     |                                |                               |
| 0.14 (0.08 to 0.19)                                       | 0.01 (-0.03 to 0.05)             | 0.09 (0.04 to 0.14)                 | 0.09 (0.05 to 0.13)            | 0.07 (0.04 to 0.11)           |
| <b>Injured during deployment, RD (95% CI)</b>             |                                  |                                     |                                |                               |
| 0.02 (-0.04 to 0.09)                                      | 0.05 (0.01 to 0.09)              | 0.04 (-0.02 to 0.09)                | -0.02 (-0.06 to 0.03)          | 0.06 (0.02 to 0.10)           |
| <b>Chronic Pain, RD (95% CI)</b>                          |                                  |                                     |                                |                               |
| 0.03 (-0.03 to 0.09)                                      | 0.01 (-0.04 to 0.05)             | 0.15 (0.10 to 0.21)                 | -0.02 (-0.07 to 0.02)          | 0.06 (0.03 to 0.10)           |
| <b>Self-rated health Excellent/Very Good, RD (95% CI)</b> |                                  |                                     |                                |                               |
| 0.12 (0.06 to 0.18)                                       | -0.03 (-0.07 to 0.02)            | 0.04 (-0.01 to 0.10)                | 0.05 (0.00 to 0.09)            | 0.01 (-0.03 to 0.05)          |
| <b>Mild or greater anxiety, RD (95% CI)</b>               |                                  |                                     |                                |                               |
| 0.03 (-0.06 to 0.12)                                      | 0.11 (0.05 to 0.17)              | 0.03 (-0.05 to 0.10)                | 0.07 (-0.01 to 0.15)           | 0.07 (0.01 to 0.13)           |
| <b>Depression, RD (95% CI)</b>                            |                                  |                                     |                                |                               |
| -0.05 (-0.14 to 0.03)                                     | -0.01 (-0.05 to 0.04)            | 0.05 (-0.03 to 0.12)                | -0.01 (-0.07 to 0.05)          | -0.03 (-0.07 to 0.01)         |
| <b>PTSD, RD (95% CI)</b>                                  |                                  |                                     |                                |                               |
| -0.03 (-0.13 to 0.06)                                     | 0.07 (0.01 to 0.13)              | -0.03 (-0.10 to 0.05)               | -0.02 (-0.08 to 0.05)          | 0.01 (-0.05 to 0.06)          |
| <b>Problem alcohol use, RD (95% CI)</b>                   |                                  |                                     |                                |                               |
| 0.03 (-0.03 to 0.10)                                      | -0.01 (-0.04 to 0.03)            | -0.08 (-0.13 to -0.03)              | -0.02 (-0.07 to 0.03)          | 0.02 (-0.02 to 0.06)          |
| <b>Any illicit drug use, RD (95% CI)</b>                  |                                  |                                     |                                |                               |
| 0.00 (-0.09 to 0.09)                                      | 0.03 (-0.03 to 0.09)             | 0.13 (0.04 to 0.22)                 | 0.13 (0.04 to 0.22)            | -0.03 (-0.08 to 0.01)         |
| <b>Absorption, † RD (95% CI)</b>                          |                                  |                                     |                                |                               |
| 0.08 (0.04 to 0.12)                                       | 0.03 (0.00 to 0.05)              | 0.02 (-0.01 to 0.06)                | 0.08 (0.05 to 0.11)            | 0.06 (0.04 to 0.08)           |

\* Interpreted as the difference in risk (probability) of membership in this latent class between levels of the covariate where a negative value means lower probability of membership in this class compared to probability at the reference level of the covariate; other covariates are standardized to their distribution among all responder

† Continuous, a one-unit change represents a 2-point change on the absorption scale, equivalently a 7-point change on the T-score scale
